# Supplementary material
Source: PubMed Central journal article supplement (PMC3152293)
Supplement: NIHMS313095-supplement-1.pdf [file NIHMS313095-supplement-1.pdf]

# Supplementary Figure 1

**a**

MDYKDHDGDYKDHDIDYKDD  
DDKMAPKKKRKVGIHGVPAA  
MAERPFQCRICMRKFAQSGD  
LTRHTKIHTGEKPFQCRICM  
RNFSRSDVLESEHIRTHTGEK  
PFACDICGKKFADRSNRIKH  
TKIHTGSQKPFQCRICMRNF  
SRSDNLSEHIRTHTGEKPFA  
CDICGRKFAQNATRINHTKI  
HLRGSQLVKSELEKKSELR  
HKLKYVPHEYIELIEIARNS  
TQDRILEMKVMEFFMKVYGY  
RGKHLGGSRKPDGAIYTVGS  
PIDYGVIVDTKAYSGGYNLP  
IGQADEMERYVEENQTRNKH  
LNPNEWWKVYPSSVTEFKFL  
FVSGHFVKGYKAQLTRLNHI  
TNCNGAVLSVEELLIGGEMI  
KAGTLTLEEVRKFNNGEIN  
F

**b**

MDYKDHDGDYKDHDIDYKDD  
DDKMAPKKKRKVGIHGVPER  
PFQCQICMRNFSRSDLSVH  
IRTHTGEKPFACDICGRKFA  
TSGHLRHTKIHTGSQKPFQ  
CRICMRNFSRSDHLSQHIRT  
HTGEKPFACDICGRKFAHAS  
TRHCHTKIHLRGSQLVKSEL  
EEKKSELRHKLKYVPHEYIE  
LIEIARNSTQDRILEMKVME  
FFMKVYGYRGKHLGGSRKPD  
GAIYTVGSPIDYGVIVDTKA  
YSGGYNLPIGQADEMQRVVK  
ENQTRNKHINPNEWWKVYPS  
SVTEFKFLVSGHFVKGYKA  
QLTRLNHKTNCNGAVLSVEE  
LLIGGEMIKAGTLTLEEVR  
KFNNGEINF

## Supplementary Figure 1 - F9 ZFN pair amino acid sequence.

Amino acid sequence of FLAG-tagged **a**, left F9 ZFN and **b**, right F9 ZFN.

## Supplementary Figure 2

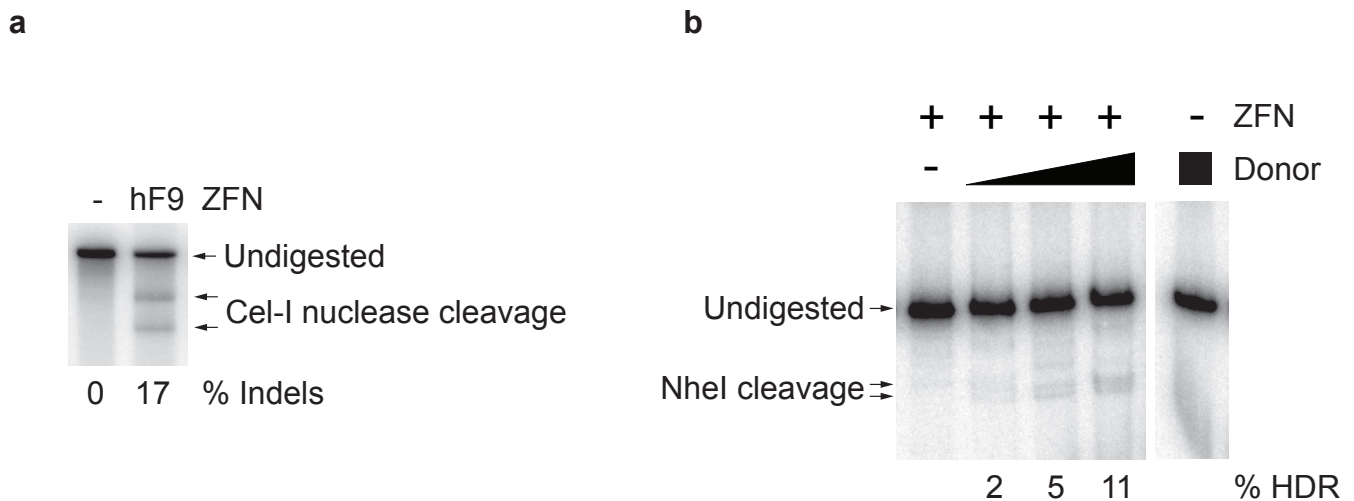

**Supplementary Figure 2 - F9 ZFNs cleave human *F9* intron 1 and induce homology-directed repair in Hep3B cells.**

**a**, Transfection of 400 ng of ZFN expression plasmid into Hep3B cells results in cleavage of the human *F9* intron 1 at day 3 post-transfection. Cel-1 assay performed with PCR using <sup>32</sup>P-labeled nucleotides, followed by PAGE and band intensity quantification by autoradiography. **b**, Co-transfection of 400 ng of ZFN expression plasmid with increasing amounts of NheI donor plasmid (0, 1, 2, and 4 μg) results in increasing levels of HDR at days 3 post-transfection, whereas transfection of the NheI donor alone (4 μg) does not result in detectable HDR. HDR PCR performed with PCR using <sup>32</sup>P-labeled nucleotides, followed by PAGE and band intensity quantification by autoradiography. Lanes with no quantification had no detectable HDR.

## Supplementary Figure 3

**a**

```

AAAGCTGACTGGCCCTGGTGCCAGGTACTGTGTCAGGGACTAGGGGTATGGGGACAGGTTAGTCCACC
AAAGCTGACTGGCCCTGGTGCCAGGTACTGTGTCAGGTACTAGGGGTATGGGGACAGGTTAGTCCACC
AAAGCTGACTGGCCCTGGTGCCAGGTACTGTGTCAGGGCTAGGGGTATGGGGACAGGTTAGTCCACC
AAAGCTGACTGGCCCTGGTGCCAGGTACTGTGTCAGGGCTAGGGGTATGGGGACAGGTTAGTCCACC
AAAGCTGACTGGCCCTGGTGCCAGGTACTGTGTCAGGGCTAGGGGTATGGGGACAGGTTAGTCCACC
AAAGCTGACTGGCCCTGGTGCCAGGTACTGTGTCAGGGCTAGGGGTATGGGGACAGGTTAGTCCACC
AAAGCTGACTGGCCCTGGTGCCAGGTACTGTGTCAGTACTAGGGGTATGGGGACAGGTTAGTCCACC
AAAGCTGACTGGCCCTGGTGCCAGGTACTGTGTCAGTACTAGGGGTATGGGGACAGGTTAGTCCACC
AAAGCTGACTGGCCCTGGTGCCAGGTACTGTGTCATTACTAGGGGTATGGGGACAGGTTAGTCCACC
AAAGCTGACTGGCCCTGGTGCCAGGTACTGTGTCGGTACTAGGGGTATGGGGACAGGTTAGTCCACC
AAAGCTGACTGGCCCTGGTGCCAGGTACTGTGTCTACTAGGGGTATGGGGACAGGTTAGTCCACC
AAAGCTGACTGGCCCTGGTGCCAGGTACTGTGTCTTACTAGGGGTATGGGGACAGGTTAGTCCACC
AAAGCTGACTGGCCCTGGTGCCAGGTACTGTGTCTTACTAGGGGTATGGGGACAGGTTAGTCCACC
AAAGCTGACTGGCCCTGGTGCCAGGTACTGTGTAGGGTTAGGGGTATGGGGACAGGTTAGTCCACC
AAAGCTGACTGGCCCTGGTGCCAGGTACTGTGTCATACTAGGGGTATGGGGACAGGTTAGTCCACC
AAAGCTGACTGGCCCTGGTGCCAGGTACTGTGTCATACTAGGGGTATGGGGACAGGTTAGTCCACC
AAAGCTGACTGGCCCTGGTGCCAGGTACTGTGTCAGGGCTAGGGTATGGGGACAGGTTAGTCCACC
AAAGCTGACTGGCCCTGGTGCCAGGTACTGTGTGGGTACTAGGGGTATGGGGACAGGTTAGTCCACC
AAAGCTGACTGGCCCTGGTGCCAGGTACTGTGTGGTACTAGGGGTATGGGGACAGGTTAGTCCACC
AAAGCTGACTGGCCCTGGTGCCAGGTACTGTGTCAGTAGGGGTATGGGGACAGGTTAGTCCACC
AAAGCTGACTGGCCCTGGTGCCAGGTACTGTGTCACTAGGGGTATGGGGACAGGTTAGTCCACC
AAAGCTGACTGGCCCTGGTGCCAGGTACTGTGTCAGGGCTAGGGTATGGGGACAGGTTAGTCCACC
AAAGCTGACTGGCCCTGGTGCCAGGTACTGTGTGGGTACTAGGGGTATGGGGACAGGTTAGTCCACC
AAAGCTGACTGGCCCTGGTGCCAGGTACTGTGTGGTACTAGGGGTATGGGGACAGGTTAGTCCACC
AAAGCTGACTGGCCCTGGTGCCAGGTACTGTGTCAGTAGGGGTATGGGGACAGGTTAGTCCACC
AAAGCTGACTGGCCCTGGTGCCAGGTACTGTGTCACTAGGGGTATGGGGACAGGTTAGTCCACC
AAAGCTGACTGGCCCTGGTGCCAGGTACTGTGTCAGGGCTAGGGTATGGGGACAGGTTAGTCCACC
AAAGCTGACTGGCCCTGGTGCCAGGTACTGTGTGGGTACTAGGGGTATGGGGACAGGTTAGTCCACC
AAAGCTGACTGGCCCTGGTGCCAGGTACTGTGTCAGGGTATGGGGACAGGTTAGTCCACC
AAAGCTGACTGGCCCTGGTGCCAGGTACTGTGTCAGGTACTAGGGGTATGGGGACAGGTTAGTCCACC
AAAGCTGACTGGCCCTGGTGCCAGGTACTGTGTCAGGGAGGGGTATGGGGACAGGTTAGTCCACC
AAAGCTGACTGGCCCTGGTGCCAGGTACTGTGTCAGGGAGGGGTATGGGGACAGGTTAGTCCACC
AAAGCTGACTGGCCCTGGTGCCAGGTACTGTGTCAGGGTACTAGGGGTATGGGGACAGGTTAGTCCACC
AAAGCTGACTGGCCCTGGTGCCAGGTACTGTGTCAGGGTATGGGGACAGGTTAGTCCACC
AAAGCTGACTGGCCCTGGTGCCAGGTACTGTGTCAGGGGACAGGTTAGTCCACC
AAAGCTGACTGGCCCTGGTGCCAGGTACTGTGTCAGGGGACAGGTTAGTCCACC
AAAGCTGACTGGCCCTGGTGCCAGGTACTGTGTCAGGGGACAGGTTAGTCCACC
AAAGCTGACTGGCCCTGGTGCCAGGTACTGTGTCAGGGGACAGGTTAGTCCACC

```

**b**

```

CTGGTGCCAGGTACTGTGTCAGGGTACTAGGGGTATGGGGAC
CTGGTGCCAGGTACTGTGTCAGGGTTACTAGGGGTATGGGGAC
CTGGTGCCAGGTACTGTGTCAGGGGTACTAGGGGTATGGGGAC
CTGGTGCCAGGTACTGTGTCAAGGGTACTAGGGGTATGGGGAC
CTGGTGCCAGGTACTGTGTCAGGGGGTACTAGGGGTATGGGGAC

```

**Supplementary Figure 3 - Sequencing of target site insertions and deletions induced by ZFNs *in vivo*.** PCR products from Cel-1 assay on ZFN-treated mice in Fig.2c were cloned and sequenced prior to treatment with Cel-1 enzyme. Sequencing of clones demonstrated **a**, deletions and **b**, insertions characteristic of imprecise DSB repair by NHEJ. Red bases indicate ZFN binding sites while blue bases indicate the 6 bp region of ZFN cleavage. Intervening white regions represent deleted bases while black bases in between ZFN binding sites indicate inserted bases. The 5' and 3' flanking black bases indicate hF9mut intron. The top line of each panel indicates the sequence of the unmodified locus.

# Supplementary Figure 4

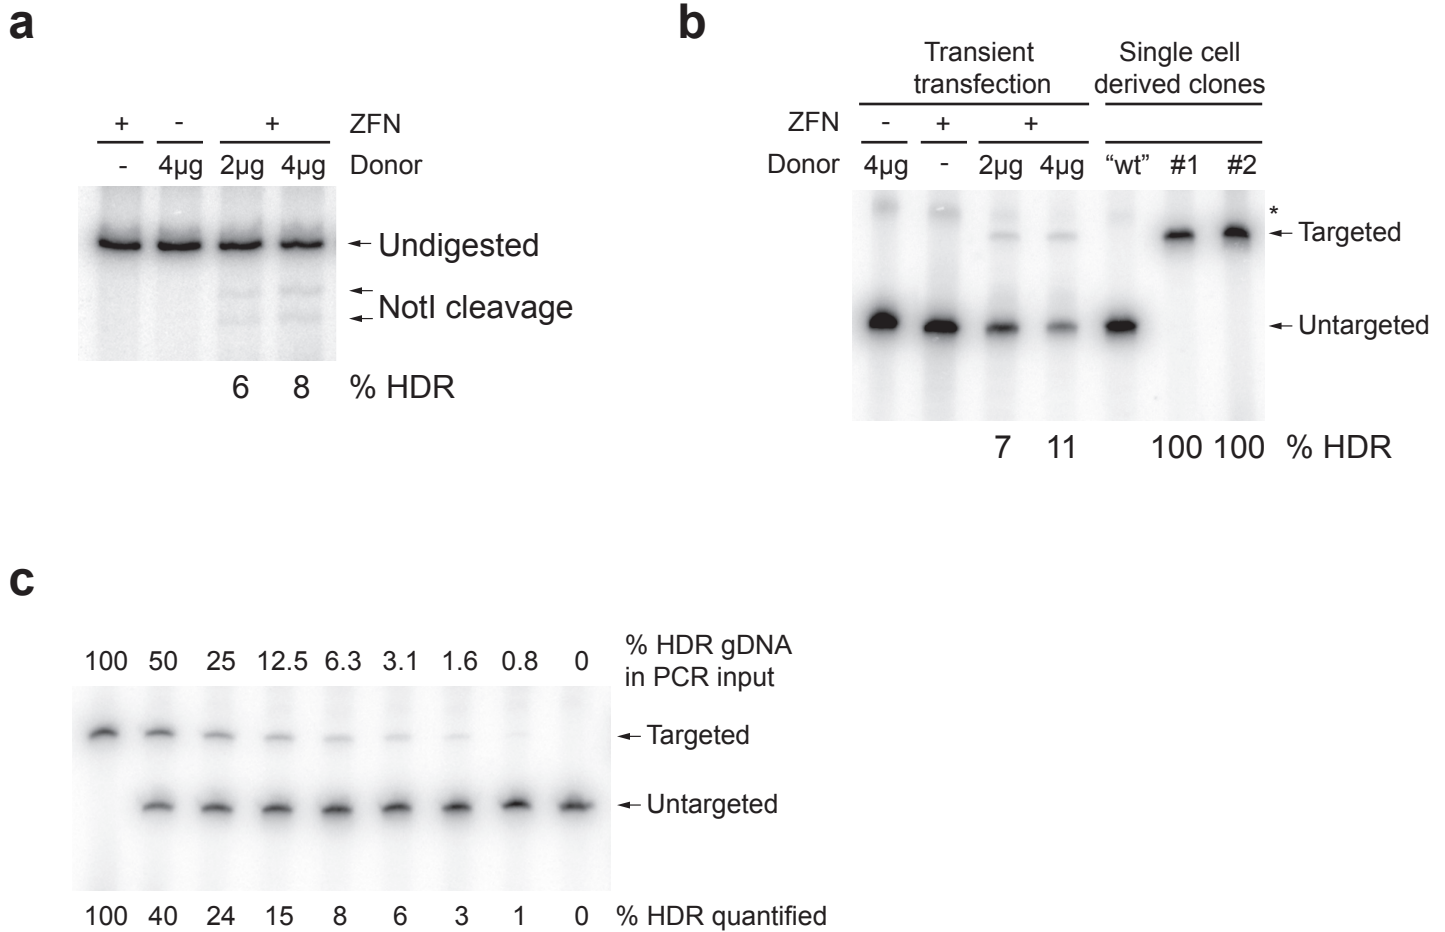

## Supplementary Figure 4 - F9 ZFNs promote HDR at the hF9mut intron in HEK293T-hF9mut cells and HDR can be quantified through PCR.

HEK293T cells were stably transduced with a lentiviral vector carrying the hF9mut mini-gene and a single cell-derived clone was expanded. **a**, Co-transfection of HEK293T-hF9mut cells with 400 ng of ZFN expression plasmid and 2  $\mu$ g or 4  $\mu$ g of NotI RFLP donor plasmid results in gene targeting 3 days post-transfection, whereas transfection of 400 ng of ZFN expression plasmid alone, or 4  $\mu$ g of donor plasmid does not result in detectable HDR. **b**, Targeted integration of the "splice acceptor – exons 2-8 coding sequence – bovine growth hormone polyA signal" cassette in HEK293T-hF9mut cells followed by the isolation of either untargeted ("wt") or targeted single cell-derived clones (#1 and #2). (\*) denotes non-specific amplicon present in all samples. **c**, Linearity of the PCR-based quantitative detection of HDR using primers P1/P3. Genomic DNA isolated from a single cell-derived targeted clone (#1) was mixed at various ratios with wild-type (non-targeted) gDNA and amplified by PCR using  $^{32}$ P-labeled nucleotides followed by PAGE and autoradiography. The intensity of the non-targeted and targeted bands were quantified. The % of detected targeted signal is shown below the gel and the theoretical signal is shown above.

## Supplementary Figure 5

**a**

| Week of life  | ZFN+Donor                                         | Mock+Donor | ZFN Alone  | p-value |
|---------------|---------------------------------------------------|------------|------------|---------|
|               | hF9mut average plasma hF.IX, ng/mL (n, std. dev.) |            |            |         |
| 4             | 124 (7, 117)                                      | ≤15 (6, 0) | ≤15 (7, 0) | 0.003   |
| 6             | 119 (7, 111)                                      | ≤15 (6, 0) | ≤15 (7, 0) | 0.003   |
| 8             | 119 (7, 122)                                      | ≤15 (6, 0) | ≤15 (7, 0) | 0.006   |
| 10 wks 1 day  | 156 (7, 140)                                      | ≤15 (6, 0) | ≤15 (7, 0) | 0.002   |
| 10 wks 2 days | 205 (7, 170)                                      | ≤15 (6, 0) | ≤15 (7, 0) | 0.0006  |
| 11            | 156 (7, 149)                                      | ≤15 (6, 0) | ≤15 (7, 0) | 0.003   |
| 12            | 171 (7, 165)                                      | 16 (6, 1)  | ≤15 (7, 0) | 0.003   |
| 13            | 126 (7, 123)                                      | ≤15 (6, 0) | ≤15 (7, 0) | 0.004   |
| 14            | 121 (7, 116)                                      | ≤15 (6, 0) | ≤15 (7, 0) | 0.003   |
| 16            | 176 (7, 144)                                      | ≤15 (6, 0) | ≤15 (7, 0) | 0.0006  |
| 18            | 177 (7, 136)                                      | ≤15 (6, 0) | ≤15 (7, 0) | 0.003   |
| 22            | 137 (7, 133)                                      | ≤15 (6, 0) | ≤15 (6, 0) | 0.003   |
| 32            | 189 (7, 223)                                      | ≤15 (6, 0) | 17 (7, 4)  | 0.01    |

**b**

| Week of life | ZFN+Donor                                            | Mock+Donor | p-value  |
|--------------|------------------------------------------------------|------------|----------|
|              | hF9mut/HB average plasma hF.IX, ng/mL (n, std. dev.) |            |          |
| 4            | 262 (9, 96)                                          | 24 (9, 17) | 0.000006 |
| 6            | 354 (8, 183)                                         | 21 (8, 10) | 0.0001   |
| 8            | 217 (6, 160)                                         | 18 (4, 7)  | 0.04     |
| 12           | 256 (5, 86)                                          | 16 (3, 2)  | 0.003    |
| 13           | 166 (5, 38)                                          | 15 (3, 0)  | 0.0006   |
| 14           | 284 (5, 49)                                          | 18 (3, 6)  | 0.0001   |

### Supplementary Figure 5 - Significant difference in hF.IX expression between groups.

**a**, hF.IX expression in ZFN+Donor group at multiple time-points compared to ZFN alone and Mock+Donor groups in hF9mut mice from Figure 4a. p-values from 2-tailed T-test.

**b**, hF.IX expression in ZFN+Donor group at multiple time-points compared to Mock+Donor group in hF9mut/HB mice from Figure 5a. p-values from 2-tailed T-test.

# Supplementary Figure 6

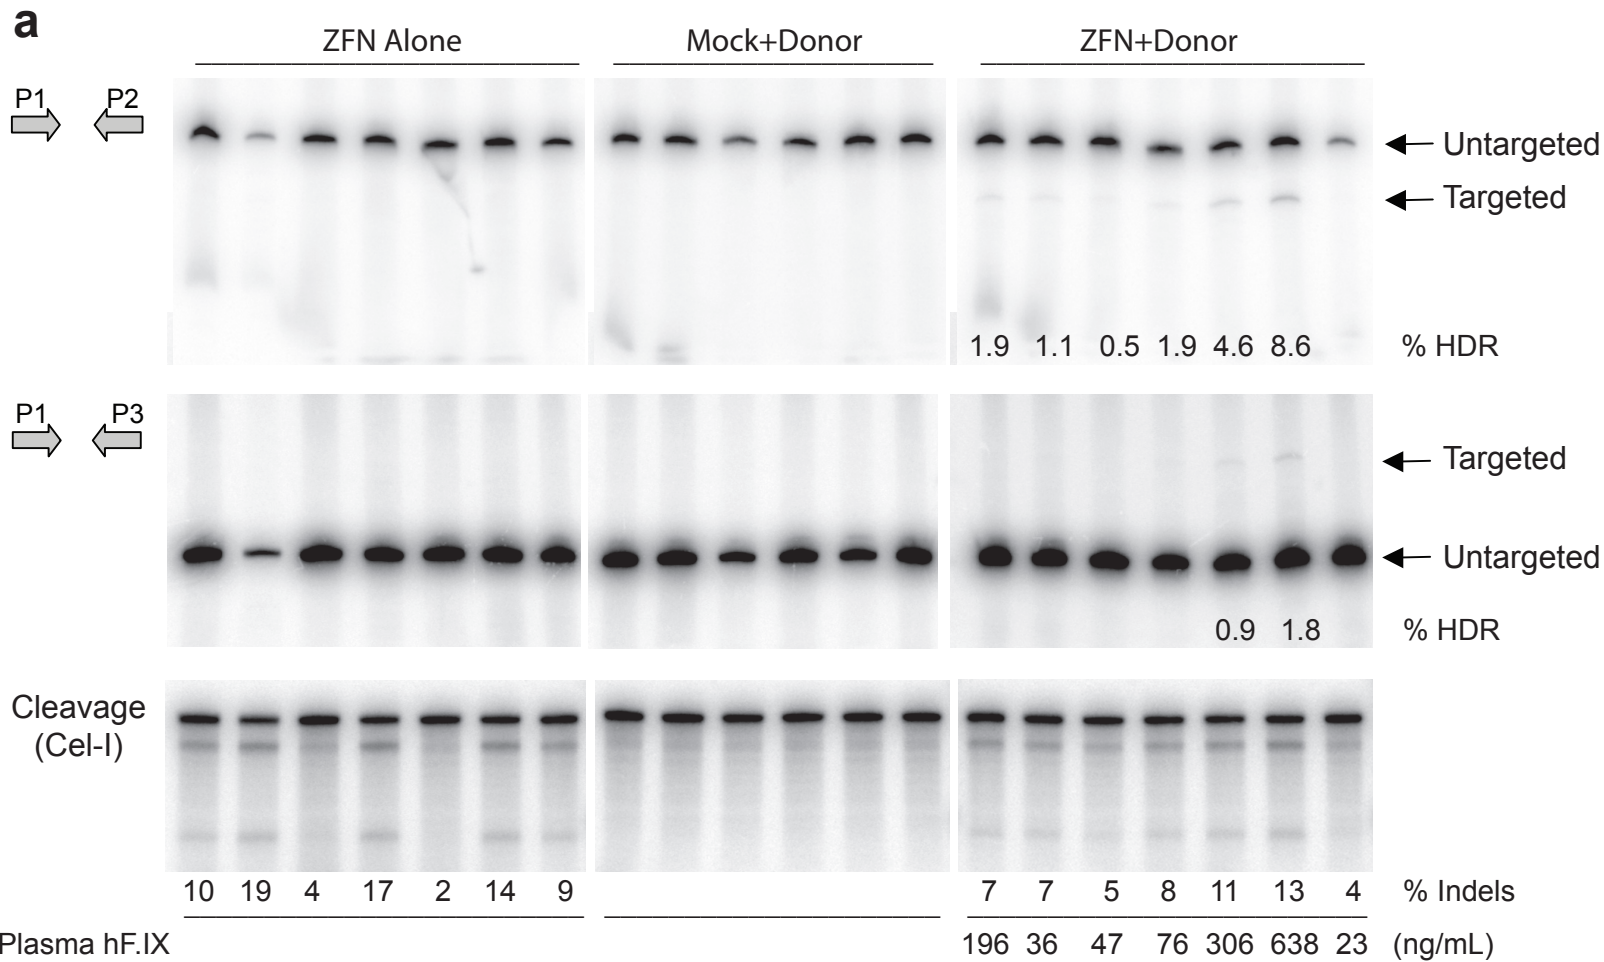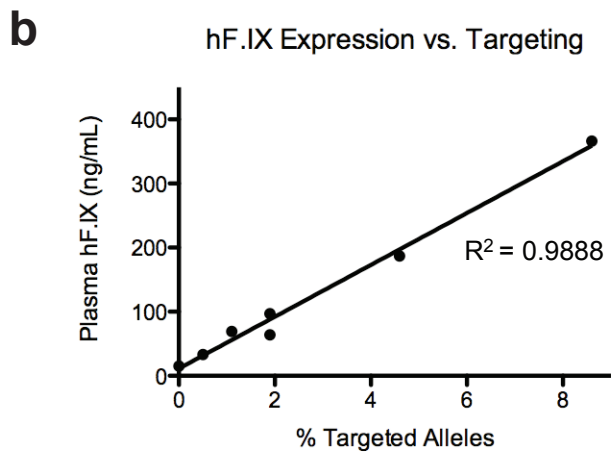

## Supplementary Figure 6 - Correlation of ZFN activity, HDR efficiency, and hF.IX expression in hF9mut mice.

**a**, Quantification of HDR efficiency using primers P1/P2 and P1/P3 PCR assays, quantification of ZFN-induced indel frequency using the Cel-I assay, and measurement of plasma hF.IX levels by ELISA in mice from Fig.4a at 32 weeks of life demonstrates correlation of ZFN cleavage activity with HDR efficiency and hF.IX expression. PCR was performed using  $^{32}\text{P}$ -labeled nucleotides, followed by PAGE and product band intensity quantification by autoradiography. Lanes with no quantification were below the limit of detection. Each lane represents an individual mouse. **b**, Linear regression of plasma hF.IX versus HDR targeting rate, as measured using primers P1/P2, demonstrates association between degree of HDR and level of hF.IX expression.

# Supplementary Figure 7

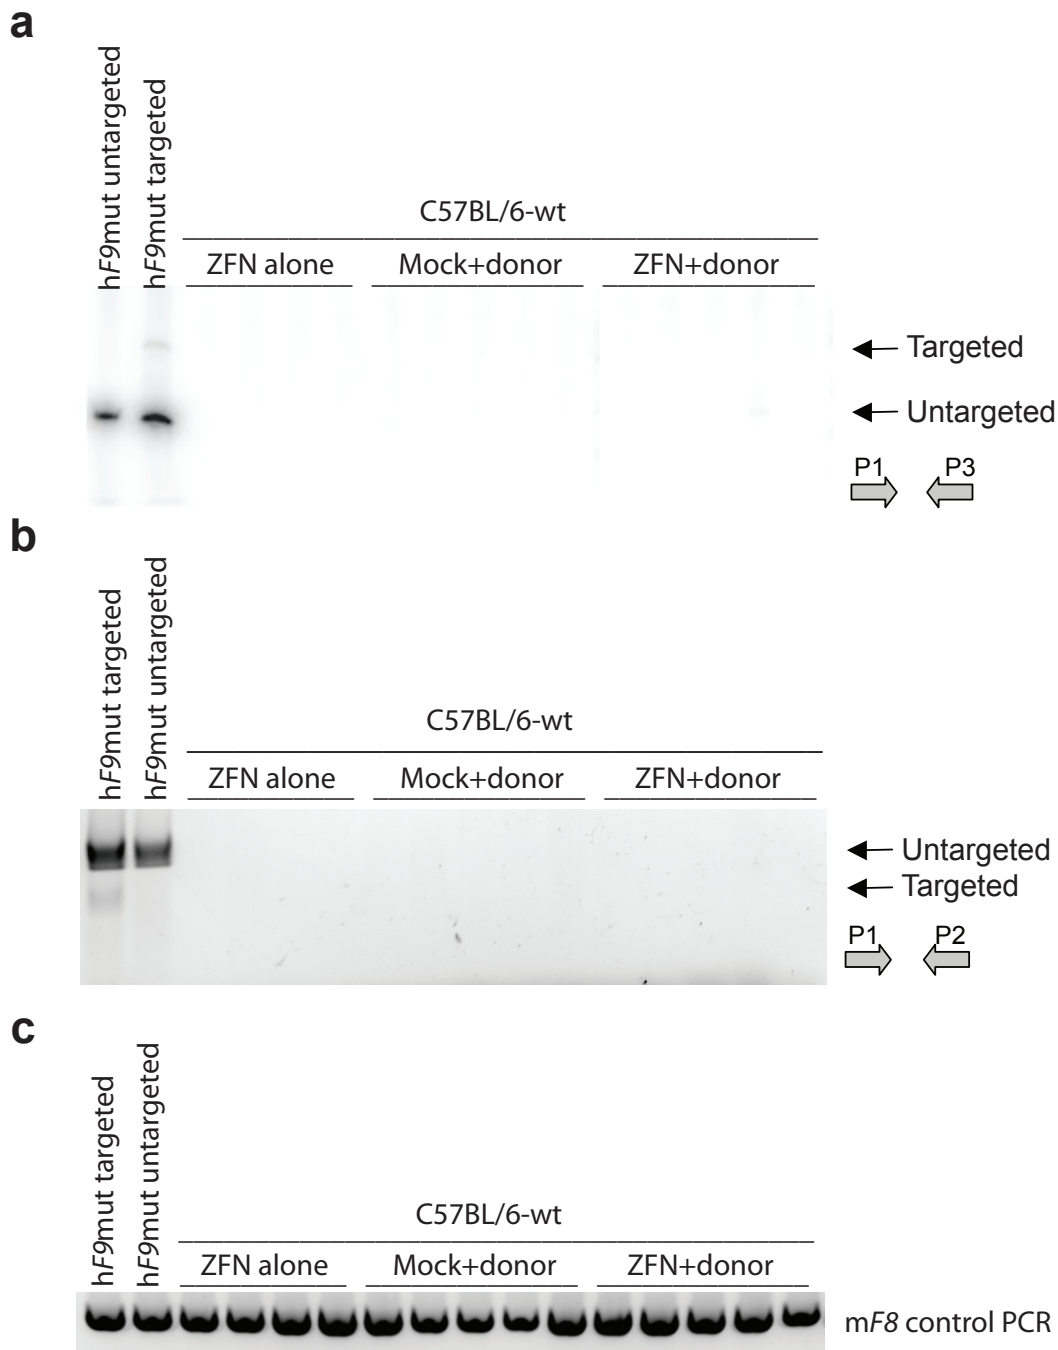

## Supplementary Figure 7 - Lack of amplification products for PCR-based HDR quantification assays in C57BL/6-wt mice.

Liver genomic DNA from control mice in Fig.4c was PCR amplified using **a**, primers P1/P3, **b**, primers P1/P2, or **c**, endogenous mouse F8 gene (to show no inhibition of PCR) primers. PCR was performed using <sup>32</sup>P-labeled nucleotides, followed by PAGE and product band detection by **a**, autoradiography, or **b-c**, ethidium bromide staining. Each lane represents an individual mouse.

# Supplementary Figure 8

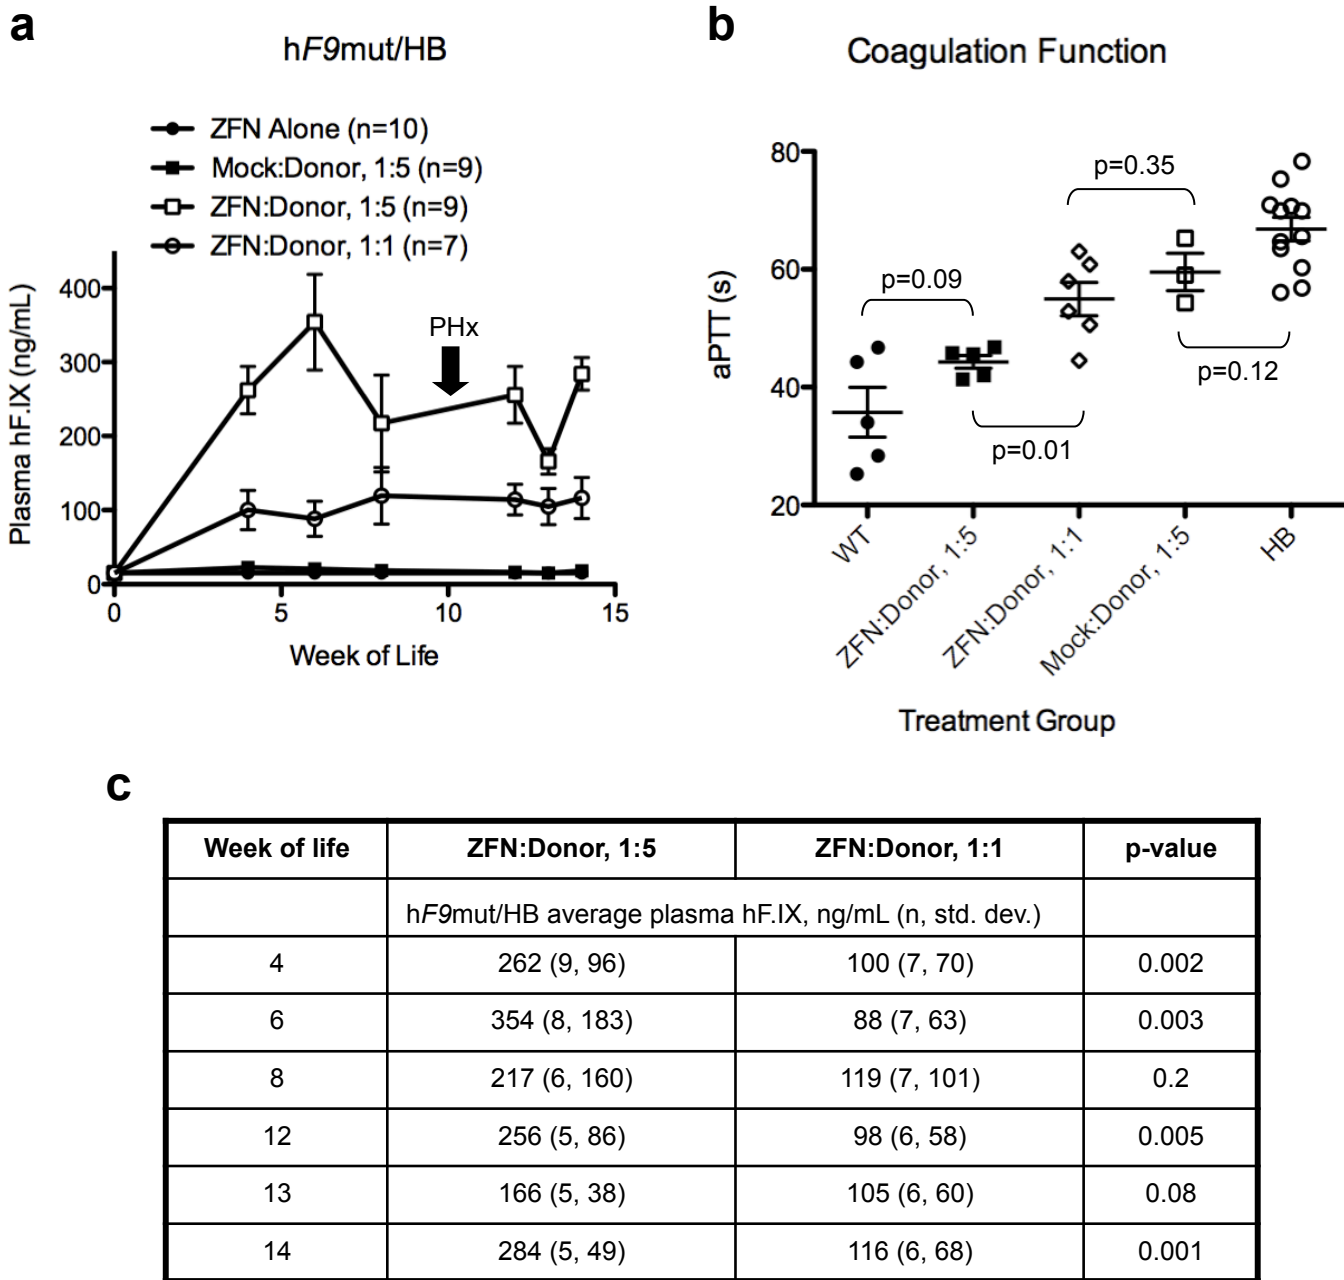

## Supplementary Figure 8 - hF.IX expression and aPTT correction are dependent on Donor dose.

**a**, Plasma hF.IX in hF9mut/HB mice following day 2 of life I.P. injection with ZFN alone (5e10vg), Mock(5e10vg)+Donor(2.5e11vg), ZFN(5e10vg)+Donor(2.5e11vg), or ZFN (5e10vg)+Donor(5e10vg). Error bars denote std. error. PHx=partial hepatectomy.

**b**, Test of clot formation by aPTT at week 14 of life for mice from panel a as well as WT and HB control mice. p-values from 2-tailed T-test.

**c**, hF.IX expression in ZFN:Donor, 1:5 group at multiple time-points compared to ZFN:Donor, 1:1 group in hF9mut/HB mice. p-values from 2-tailed T-test.



# Supplementary Figure 9

|       |          |                                 | Predicted ZFN target site          |             |               |                  |           |  |  |
|-------|----------|---------------------------------|------------------------------------|-------------|---------------|------------------|-----------|--|--|
|       |          |                                 | gTGCCAGGTA                         | CTGTG       | Tagggt        | ACTAGGGGTCTGg    |           |  |  |
|       |          |                                 | (Left ZFN)                         |             |               | (Right ZFN)      |           |  |  |
| Chr.  | Location | Nucleotide position (mm8 build) | Potential site                     | Mismatches* | Gene          | Position in Gene | Cel-1 (%) |  |  |
| chr9  | 9qE3.1   | 85644480-85644514               | AaGgCAGGTgCTGTGTAAGTACACTAaGGaTGTG | 5           | none          | N/A              | 4         |  |  |
| chr2  | 2qH4     | 178784182-178784212             | TCACACCCtTAGGAAGAGAgTgGGGGTCTGG    | 3           | none          | N/A              | <1        |  |  |
| chr4  | 4qB3     | 58366981-58367014               | CCgGACTCCTAGGACCCAgCACAGTgCCCGGCAC | 4           | none          | N/A              | <1        |  |  |
| chr11 | 11qB4    | 71934573-71934603               | CCACACCCtAgGAGAAGcCTAGtGtTCTGG     | 4           | Pitpnm3       | Intron 2         | <1        |  |  |
| chrX  | XqC3     | 95501151-95501184               | ATGCCAtGTCTGTGcCTGTgCcAGGGaTGTGG   | 5           | none          | N/A              | <1        |  |  |
| chr14 | 14qA3    | 27637751-27637781               | TCaAaCCCCtAGGAAAATgCTAGaGGTCaGT    | 4           | none          | N/A              | <1        |  |  |
| chr4  | 4qD2.2   | 121711455-121711485             | ACAtACTCtTAGGGTACTACTcaGGGTCTGG    | 5           | none          | N/A              | <1        |  |  |
| chr4  | 4qD2.2   | 121973087-121973117             | ACAtACTCtTAGGGTACTACTcaGGGTCTGG    | 5           | none          | N/A              | <1        |  |  |
| chr5  | 5qF      | 120448948-120448978             | TCAGAgCCaCAGGACCCACTAGGGGTGTGG     | 3           | Rbm19         | Intron 23        | <1        |  |  |
| chr8  | 8qA1.1   | 12898527-12898558               | CCgCACaCCtTaGGGAAAACCTAGGGGTCTGG   | 4           | none          | N/A              | <1        |  |  |
| chr2  | 2qB      | 35247904-35247934               | CCcCACCCtCAGcAGCCTggTAGGGGTGTGT    | 6           | Ggta1         | Intron 2         | <1        |  |  |
| chr13 | 13qD1    | 97361947-97361977               | AaACACCCCTAGGAGTCTCCTgGGGaTgGCG    | 4           | none          | N/A              | <1        |  |  |
| chr7  | 7qF3     | 125662683-125662713             | CCACTcCTCTAGTGAAGgCTAaGGGTCTGA     | 4           | D430042O09Rik | Intron 24        | <1        |  |  |
| chr19 | 19qD1    | 50113440-50113470               | TCACAtCCtTAGTAGCATCCTtaGaGTGTGG    | 5           | none          | N/A              | <1        |  |  |
| chr4  | 4qD3     | 136746026-136746056             | CCAGctCCCTAGTGGCTTCTAaGGGTCTGC     | 4           | Hspg2         | Intron 1         | <1        |  |  |
| chr4  | 4qD2.2   | 123884923-123884954             | TCgCAaCCCTAGGAGAGAgCcAGGGGTCTGG    | 4           | none          | N/A              | <1        |  |  |
| chr3  | 3qE3     | 79023411-79023441               | CCTGACCCtTAGTAACCTgCTAatGtTCTGA    | 6           | none          | N/A              | <1        |  |  |
| chr1  | 1qA2     | 9983321-9983355                 | CCAGACCCtTAGGTCGTAACACTgTAGCTGGgAG | 4           | Lrrc67        | Intron 5         | <1        |  |  |
| chr4  | 4qB2     | 52798123-52798154               | GcgCAtCCtTAGTAgTTGACCTAGGGGTCTT    | 4           | none          | N/A              | <1        |  |  |
| chr7  | 7qD1     | 74726604-74726634               | GCAGACCCCTgTCTGTgCTAGGGaTgGgG      | 4           | none          | N/A              | <1        |  |  |

## Supplementary Figure 9 - Off-target cleavage by F9 ZFNs *in vivo*.

Potential off-target cleavage sites in the mouse genome as determined using a SELEX approach. Mismatches are indicated by lower-case letters. To determine the frequency of off-target ZFN-induced insertions and deletions, the Cel-I assay was performed at each site using liver genomic DNA of mice from Figure 2c and averaged among the 4 samples.

# Supplementary Figure 10

**a**

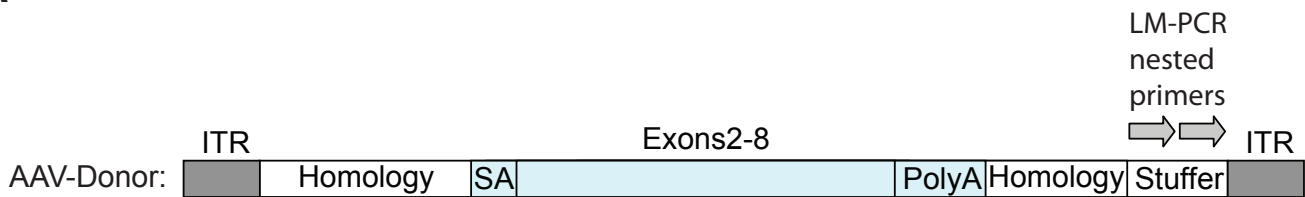

**b**

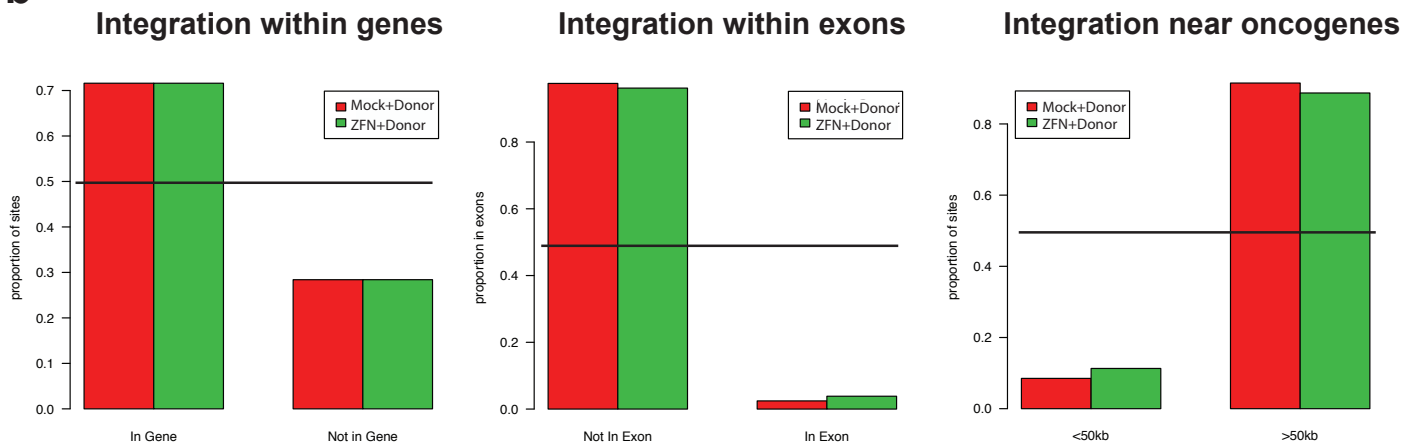

## Supplementary Figure 10- LM-PCR cloning and 454 pyrosequencing to characterize AAV-F9 donor integration junctions at off-target sites.

We used the strategy described in Li et al., 2011 to characterize AAV-Donor integration sites in the mouse genome at sites distant from the hF9 target site. **a**, LM-PCR strategy to clone NHEJ-mediated events by using donor vector primers hybridizing to the stuffer. The stuffer is outside the arms of homology and thus is eliminated by HDR events. This approach thus maps integration sites where the stuffer remained intact (i.e. NHEJ-dependent integrations) and could not query HDR-mediated events because 454 reads would not span the length of the arms of homology. To create the second primer binding site, genomic DNA was cleaved with a restriction enzyme and ligated to a linker, which was then used as the binding site for the reverse PCR primer. **b**, Integration site preferences for AAV Donor integrations within the mouse genome. One plate of 454/Roche Titanium sequencing was used to query integration sites from five mice treated with ZFN + Donor, and five control mice treated with Mock + Donor. The number of junction sequence reads aligning to unique sites in the mouse genome in each group were 5801 (ZFN + Donor) or 14048 (Mock + Donor). The relative likelihood of donor integrations to occur within genes, within exons, and within 50kb of oncogenes relative to randomly selected sites within the mouse genome<sup>30</sup> are indicated by the bar graphs (red for Mock + Donor and green for ZFN + Donor). Events are more likely to occur than random if above the black line and less likely if below the black line. No significant differences were detected in the presence or absence of the AAV-ZFN vector for these comparisons, indicating that ZFN cleavage at off-target sites did not have a strong effect on vector integration. Sequence data are available from the National Center for Biotechnology Information (NCBI) Genome Survey Sequences Database (GSSS, [www.ncbi.nlm.nih.gov/dbGSS](http://www.ncbi.nlm.nih.gov/dbGSS), accession numbers: HR941099 - HR999999, and JJ000001-JJ725186).

# Supplementary Figure 11

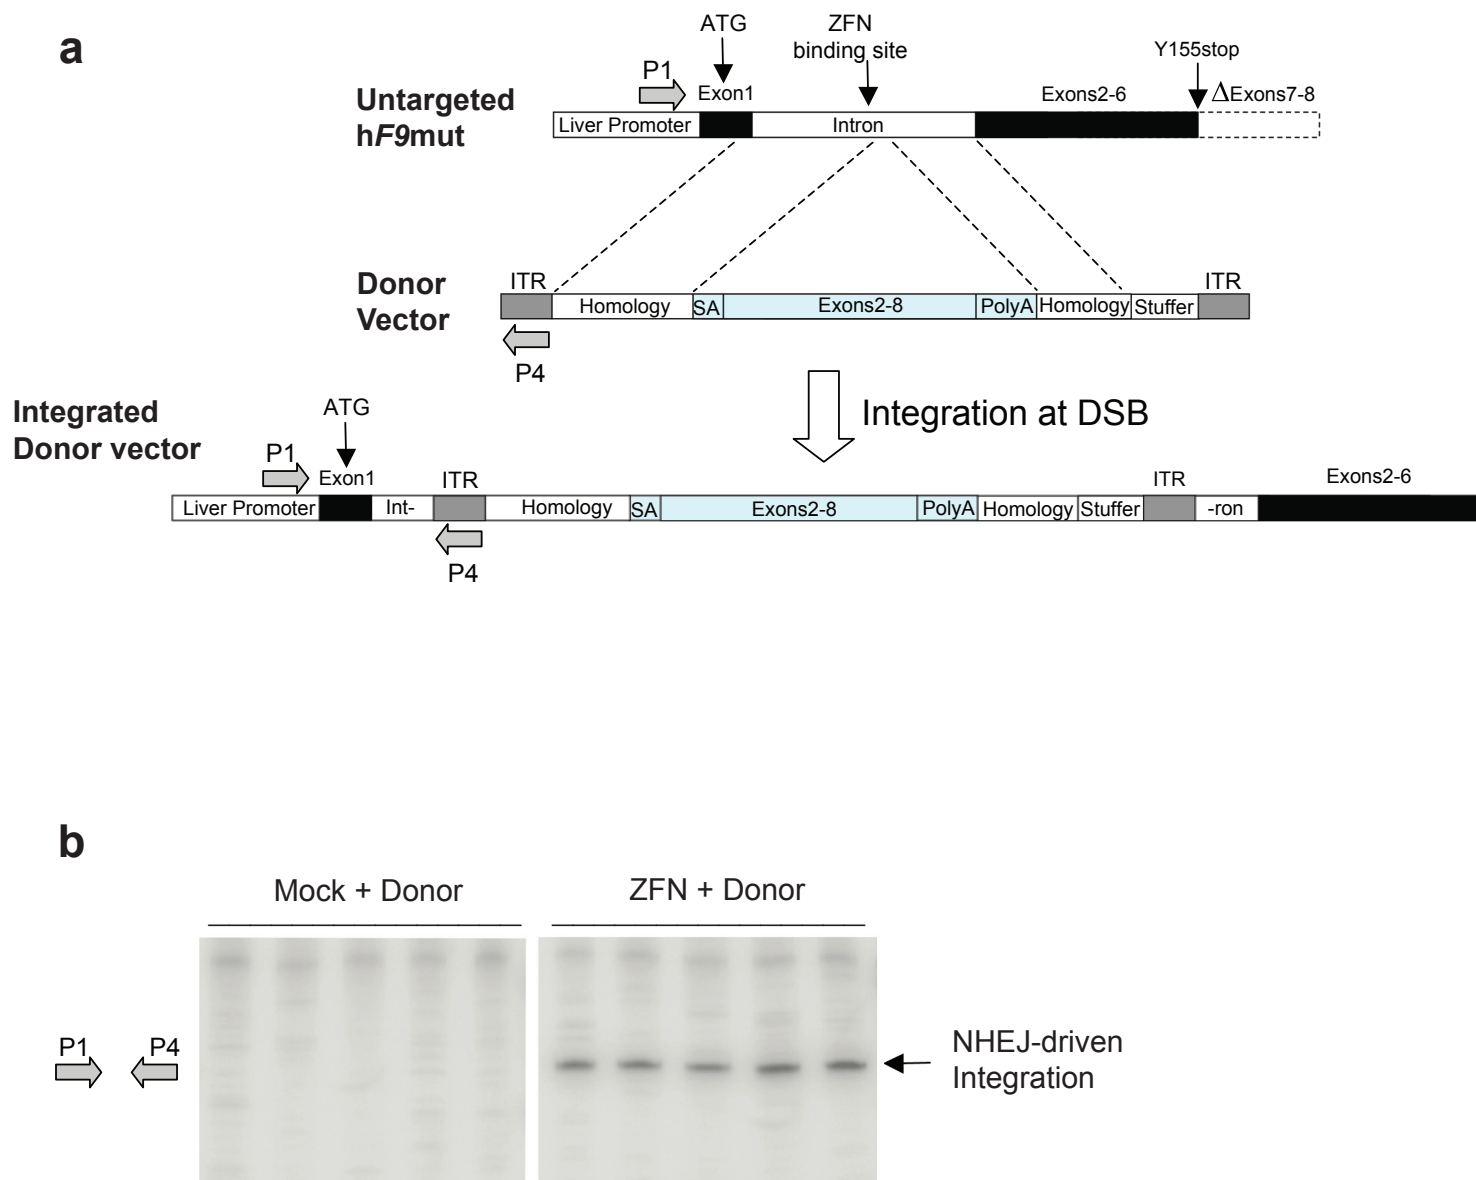

## Supplementary Figure 11 - Capture of vector genome at the ZFN target site.

**a**, Vector DNA targeted integration at the ZFN target site can be detected through PCR using primers P1 and P4.  
**b**, PCR analysis with primer pair P1/P4 showing vector integration at the ZFN target site. PCR was performed using  $^{32}\text{P}$ -labeled nucleotides, followed by PAGE and autoradiographed.

# Supplementary Figure 12

**a**

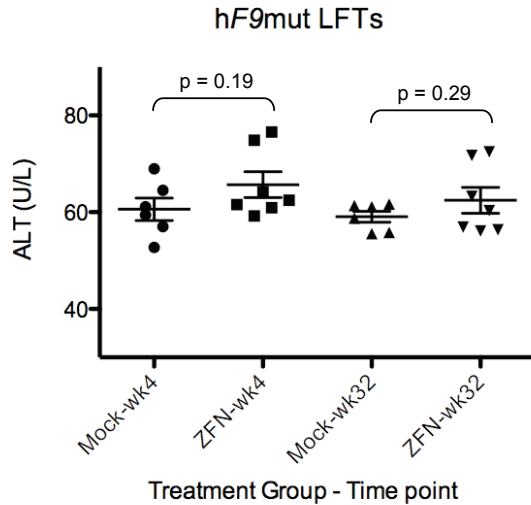

**b**

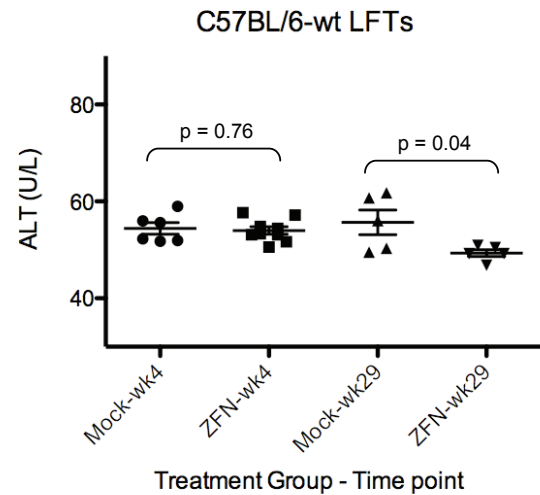

**c**

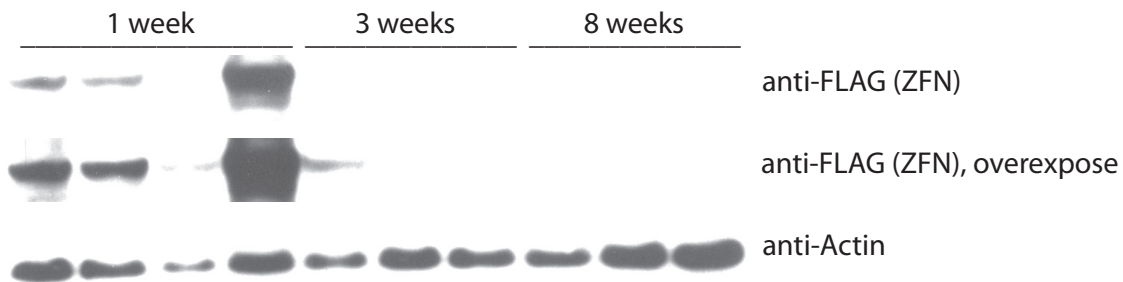

**Supplementary Figure 12 - Kinetics of liver function tests and ZFN expression after neonatal injection.** Measurement of plasma alanine aminotransferase (ALT) by chromogenic assay as a marker for liver damage at various time-points following day 2 of life I.P. injection of  $2.5 \times 10^{11}$  v.g. AAV-Donor and  $5 \times 10^{10}$  v.g. of AAV-ZFN or AAV-Mock in **a**, hF9mut and **b**, C57BL/6-wt mice. **c**, Western blotting to detect ZFN expression in whole liver lysate at weeks 1, 3, and 8 post- day 2 of life I.P. injection of  $5 \times 10^{10}$  v.g. of AAV-ZFN. Note that the loss of ZFN expression by 3 weeks of life likely contributes to the absence of toxicity.

# Supplementary Figure 13

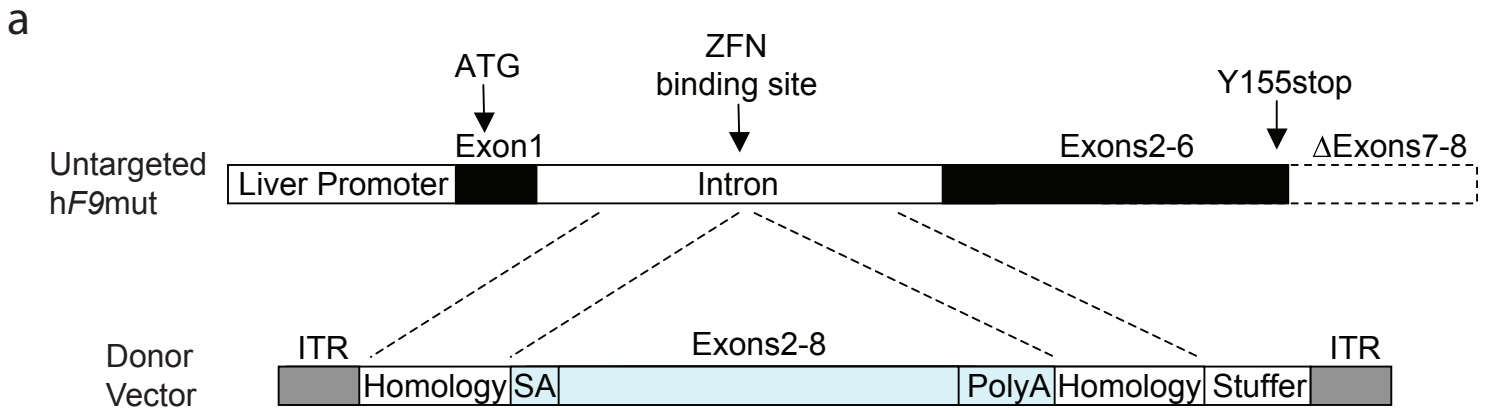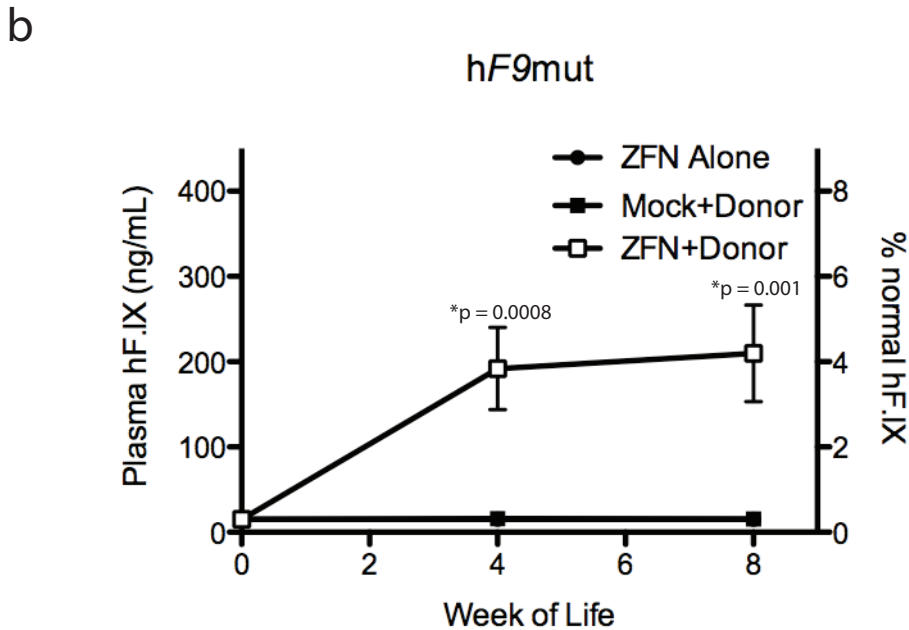

## Supplementary Figure 13 - Expression of hF.IX in mice receiving ZFN and a Donor lacking exon 1 in the left arm of homology.

**a**, Schematic showing the map of a donor vector, distinct from the donor vector in Fig.3a in that it does not contain exon 1 sequence within the 5' arm of homology. **b**, Plasma hF.IX levels in hF9mut mice following I.P. injection at day 2 of life with either 5e10 v.g. AAV-ZFN alone (n=7), 5e10 v.g. AAV-ZFN and 2.5e11 v.g. of the new AAV-Donor (n=8), or 5e10 v.g. AAV-Mock and 2.5e11 v.g. of the new AAV-Donor (n=10). Plasma hF.IX assayed by ELISA. Error bars denote standard error. P-values from 2-tailed T-test.

# Supplementary Figure 14

ATTTAAATGGCCGGCCAGTAGGCTCAGAGGCACACAGGAGTTTCTGGGCTCACCCCTGCCCCCTTCCA  
ACCCCTCAGTTCCCATCCTCCAGCAGCTGTTTGTGTGCTGCCTCTGAAGTCCACACTGAACAACTTC  
AGCCTACTCATGTCCCTAAAATGGGCAAACATTGCAAGCAGCAAACAGCAAACACACAGCCCTCCCTG  
CCTGCTGACCTTGGAGCTGGGGCAGAGGTGAGAGACCTCTCTGGGCCCATGCCACCTCCAACATCCA  
CTCGACCCCTTGGAAATTCGGTGGAGAGGAGCAGAGGTTGTCCTGGCGTGGTTTAGGTAGTGTGAGA  
GGGGTACCCGGGGATCTTGCTACCAGTGGAAACAGCCACTAAGGATTCTGCAGTGAGAGCAGAGGGC  
CAGCTAAGTGGTACTCTCCCAGAGACTGTCTGACTCACGCCACCCCTCCACCTTGGACACAGGACG  
CTGTGGTTTCTGAGCCAGGTACAATGACTCCTTTCGGTAAGTGCAGTGGAAGCTGTACACTGCCCAGG  
CAAAGCGTCCGGGCAGCGTAGGCGGGCGACTCAGATCCAGCCAGTGGACTTAGCCCTGTTTGCT  
CCTCCGATAACTGGGGTGACCTTGGTTAATATTCACCAGCAGCCTCCCCGTTGCCCTCTGGATCCA  
CTGCTTAAATACGGACGAGGACAGGGCCCTGTCTCCTCAGCTTCAGGCACCACCCTGACCTGGGAC  
AGTGAATGATCCCCCTGATCTGCGGCCCTCGACGGTATCGATAAGCTTGATATCGAATTCTAGTCGTCGA  
CCACTTTCACAATCTGCTAGCAAAGGTTATGCAGCGCGTGAACATGATCATGGCAGAATCACCAGGCC  
TCATCACCATCTGCCTTTTAGGATATCTACTCAGTGCTGAATGTACAGGTTTGTTCCTTTTTAAAATAC  
ATTGAGTATGCTTGCCTTTTAGATATAGAAATATCTGATGCTGTCTTCTTCACTAAATTTTGATTACATGAT  
TTGACAGCAATATTGAAGAGTCTAACAGCCAGCACGCAGGTTGGTAAGTACTGGTTCTTTGTTAGCTAG  
GTTTTCTTCTTCTCATTTTTTAAAATAAATAGATCGACAATGCTTATGATGCATTTATGTTAATAAACACT  
GTTCAGTTCATGATTTGGTCATGTAATTCCTGTTAGAAAACATTCATCTCCTTGGTTTAAAAAATTAATA  
GTGGGAAAACAAAGAAATAGCAGAATATAGTGAATAAATAAACCACATTATTTTTGTTTGGACTTACCA  
CTTTGAAATCAAATGGGAAACAAAAGCACAAACAATGGCCTTATTTACACAAAAGTCTGATTTTAAGA  
TATATGACATTTCAAGGTTTCAGAAATGTAATGAGGTGTGTCTCTAATTTTTAAATTATATATCTTCAAT  
TTAAAGTTTTAGTTAAACATAAAGATTAACCTTTCATTAGCAAGCTGTTAGTTATCACCAAAGCTTTTCAT  
GGATTAGGAAAAAATCATTGTCTCTATGTCAAACATCTTGGAGTTGATATTTGGGGAAACACAATACT  
CAGTTGAGTTCCTAGGGGAGAAAAGCAAGCTTAAAGAATTGACATAAAGAGTAGGAAGTTAGCTAATGC  
AACATATATCACTTTGTTTTTACAACACTACAGTGACTTTATGTATTTCCAGAGGAAGGCATACAGGGA  
AGAAATTATCCCATTTGGACAAACAGCATGTTCTCACAGGAAGCATTATCACACTTACTTGTCAACTTT  
CTAGAATCAAATCTAGTAGCTGACAGTACCAGGATCAGGGGTGCCAACCTAAGCACCCCCAGAAAGC  
TGACTGGCCCTGGTGCCAGGTTACTGTGTGAGGGTACTAGGGGTATGGGGACAGGTTAGTCCACCTGA  
GTGGGAAGAAGCGGTGAAAGGAGTCCAATCCATGTTTAAATGGCGGCAGTTGCAAGGAGCTGGTCAT  
CCTCATCTGATAAACTGCAAAGGCTGCGGCAGTTACGCTAGGGATAACAGGGTAATATAGGGTGGTT  
CCCCTCCAGACATGATGTCAGCTGTGAAATCGACGTCGCTGGACCATAATTAGGCTTCTGTTCTTCAG  
GAGACATTTGTTCAAAGTCATTTGGGCAACCATATTCTGAAAACAGCCCAGCCAGGGTGATGGATCACT  
TTGCAAAGATCCTCAATGAGCTATTTTCAAGTATGACAAAGTGTGAAGTTAACCGCTCATTGAGAAC  
TTTTTTTTCATCAAAGTAAATCAAATATGATTAGAAATCTGACCTTTTATTACTGGAATTCTTTGACT  
AAAAGTAAATTTGAATTTAATTCCTAAATCTCCATGTGTATACAGTACTGTGGGAACATCACAGATTTTG  
GCTCCATGCCCTAAAGAGAAATTTGGCTTTCAGATTATTTGGATTAATAAACAAGACTTTCTTAAGAGATG  
TAAAATTTTATGATGTTTTCTTTTTGCTAAAACATAAGAATTATCTTTTACATTTCAAGTTTTCTTGATC  
ATGAAAACGCCAACAAAATTCTGAATCGGCCAAAGAGGTATAATTCAAGGTAATTGGAAGAGTTTGTTC  
AAGGGAACCTTGAGAGAGAATGTATGGAAGAAAAGTGTAGTTTTGAAGAAGCACGAGAAGTTTTTGA  
AACACTGAAAGAACAACACTGAATTTTGAAGCAGTATGTTGATGGAGATCAGTGTGAGTCCAATCCATGT  
TTAAATGGCGGCAGTTGCAAGGATGACATTAATTCCTATGAATGTTGGTGTCCCTTTGGATTTGAAGGA  
AAGAACTGTGAATTAGATGTAACATGTAACATTAAGAATGGCAGATGCCAGCAGTTTTGTAAAAATAGTG  
CTGATAACAAGGTGGTTTGTCTCTGACTGAGGGATATCGACTTGCAGAAAACCAGAAGTCTGTGAA  
CCAGCAGTGCCATTTCCATGTGGAAGAGTTTTCTGTTTCACAAACCTTCTAAGCTCACCCGTGCTGAGGC  
TGTTTTCTGATGTGGACTATAGGGCCGGCCATTTAAAT

## Supplementary Figure S14 - hF9mut mini-gene sequence.

Nucleotide sequence for the hF9mut construct. Underlined regions indicate liver enhancer and promoter (bases 20-742), hF9 exon 1 (bases 808-923), ZFN target site (bases 1881-1910), and hF9 exons 2-6 (bases 2548-3062).
